# Supplementary material
Source: publisher figshare collection journal article supplement (https://frontiersin.figshare.com/ndownloader/files/24100976)
Supplement: Supplementary file [file 24100976]

## Monthly changes in antimicrobial usage in Danish sow herds

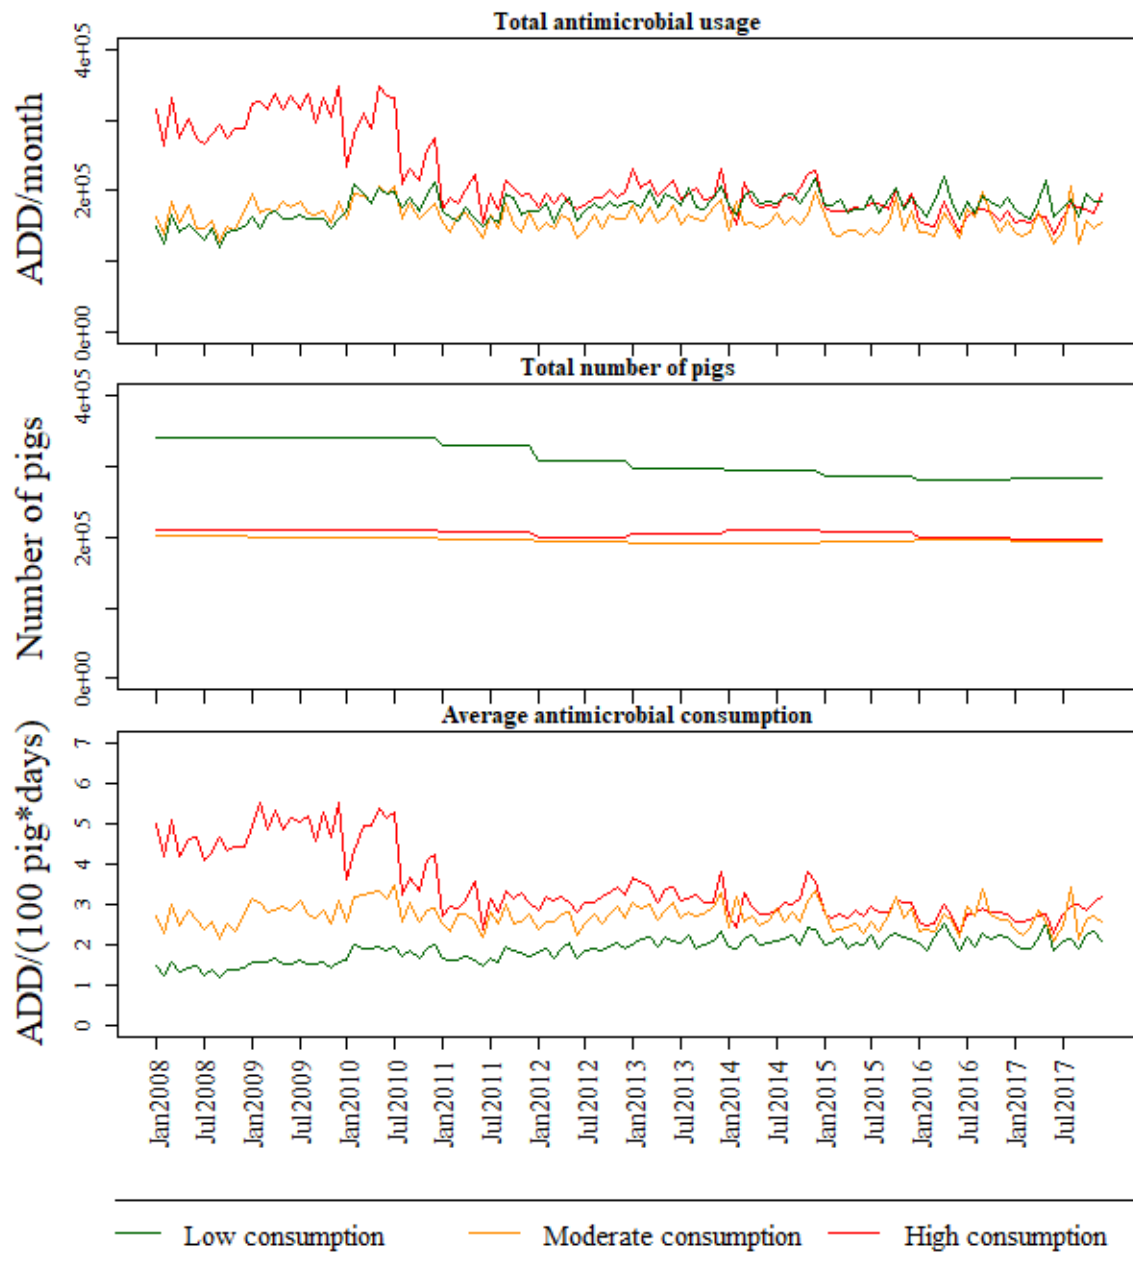

The categories (subpopulations) for the antimicrobial consumption were estimated based on data from 2008 and 2009 based on median and 3<sup>rd</sup> quartile values.

Total monthly antimicrobial consumption for the study subpopulations of sows was estimated from VetStat data.

Number of sows in the study subpopulations was estimated as a yearly average based on Manure Account data for each herd.

Monthly mean was calculated across each study subpopulation.

## Monthly changes in antimicrobial usage in Danish weaner herd

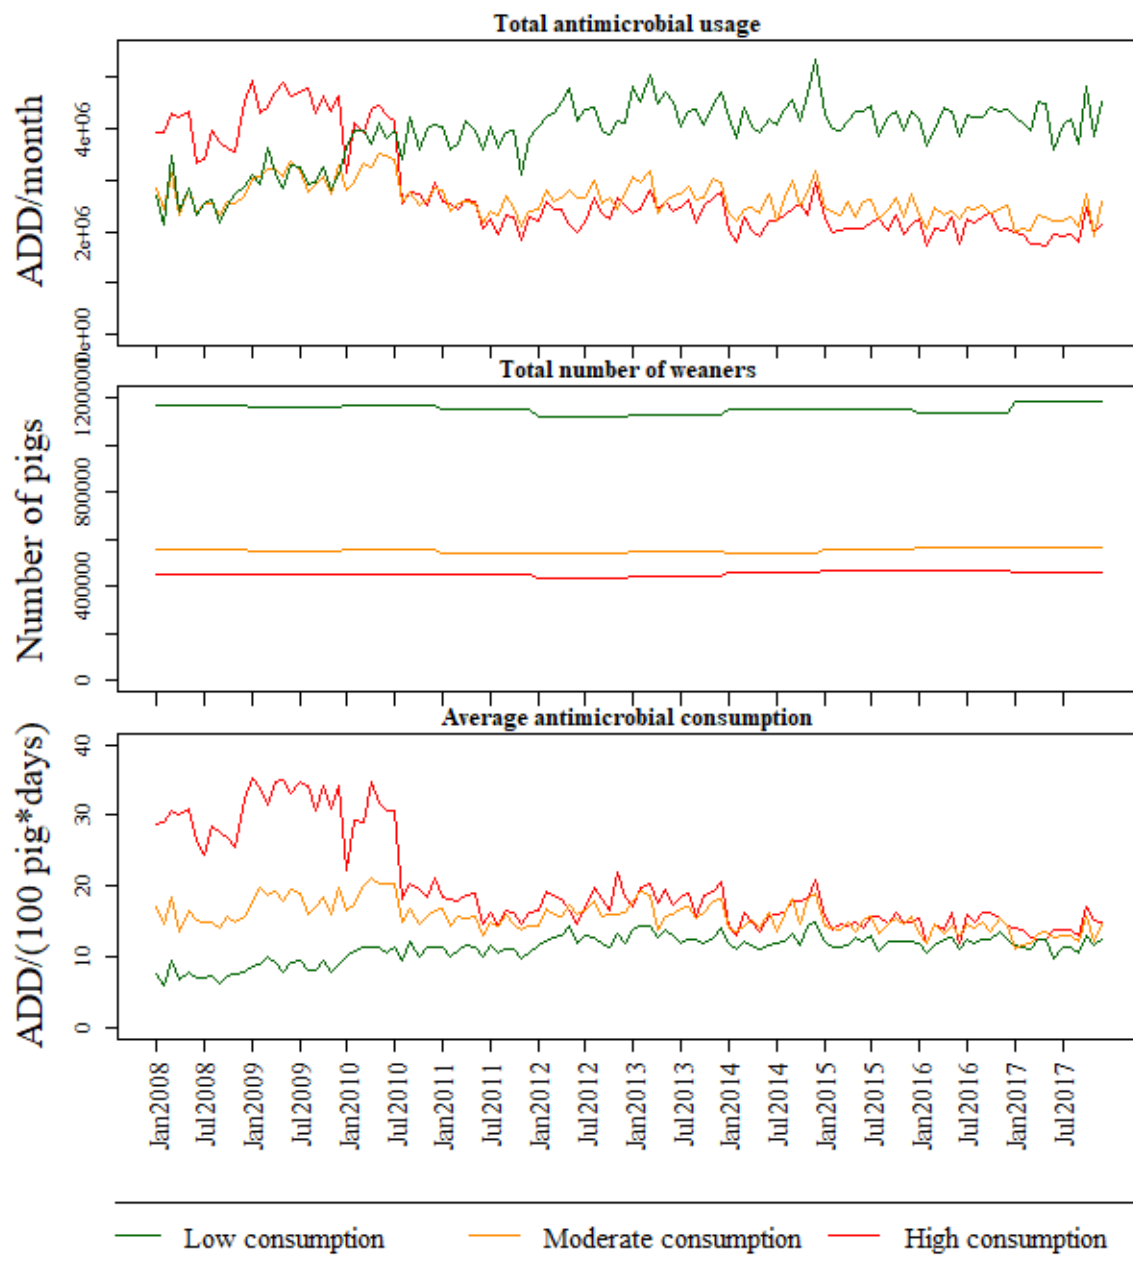

The categories (subpopulations) for the antimicrobial consumption were estimated based on data from 2008 and 2009 based on median and 3<sup>rd</sup> quartile values.

Total monthly antimicrobial consumption for the study subpopulations of weaners was estimated from VetStat data.

Number of weaners in the study subpopulations was estimated as a yearly average based on Manure Account data for each herd.

Monthly mean was calculated across each study subpopulation.

## Monthly changes in antimicrobial usage in Danish finisher herd

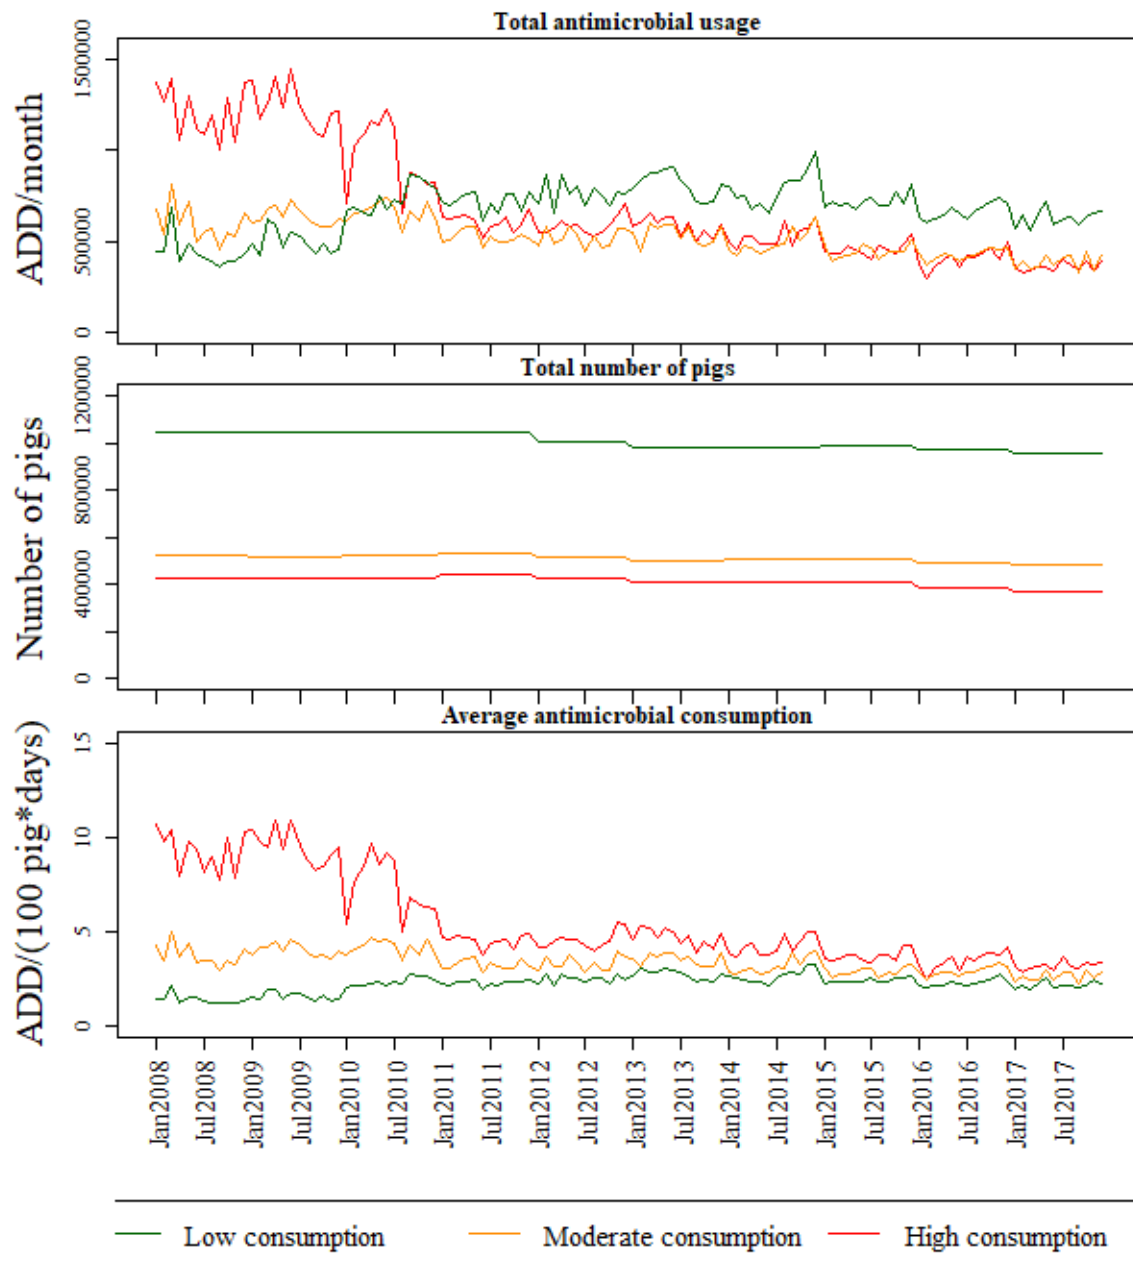

The categories (subpopulations) for the antimicrobial consumption were estimated based on data from 2008 and 2009 based on median and 3<sup>rd</sup> quartile values.

Total monthly antimicrobial consumption for the study subpopulations of finishers was estimated from VetStat data.

Number of finishers in the study subpopulations was estimated as a yearly average based on Manure Account data for each herd.

Monthly mean was calculated across each study subpopulation.
